# Supplementary material for: JAK/STAT blockade reverses the malignant phenotype of Hodgkin and Reed-Sternberg cells
Source: PubMed Central journal article supplement — Blood Adv. 2022 Dec 5;7(15):4135–47. doi: 10.1182/bloodadvances.2021006336 (PMC10407154; doi:10.1182/bloodadvances.2021006336), 2022-12-05

## JAK/STAT blockade reverses the malignant phenotype of Hodgkin and Reed–Sternberg cells

Sara Fernández<sup>1</sup>, Jose L Solórzano<sup>2</sup>, Eva Díaz<sup>1</sup>, Victoria Menéndez<sup>1</sup>, Lorena Maestre<sup>3,7</sup>, Sara Palacios<sup>1</sup>, Mar López<sup>1</sup>, Argentina Colmenero<sup>4</sup>, Mónica Estévez<sup>5</sup>, Carlos Montalbán<sup>5</sup>, Ángel Martínez<sup>6</sup>, Giovanna Roncador<sup>3,7</sup>, and Juan F García<sup>1,2,7</sup>.

- (1) Translational Research Laboratory, MD Anderson Cancer Center Madrid, Spain.
- (2) Department of Pathology, MD Anderson Cancer Center Madrid, Spain.
- (3) Monoclonal Antibodies Unit, Biotechnology Program, Spanish National Cancer Centre (CNIO), Madrid, Spain.
- (4) Flow Cytometry Unit, Eurofins-Megalab, MD Anderson Cancer Center Madrid, Spain.
- (5) Department of Hematology, MD Anderson Cancer Center Madrid, Spain.
- (6) Cytogenetic Unit, Eurofins-Megalab, MD Anderson Cancer Center Madrid, Spain.
- (7) Centro de Investigación Biomédica en Red de Cáncer (CIBERONC), Spain.

### SUPPLEMENTARY INFORMATION

**Supplemental Table 1.** Clinical data.

**Supplemental Table 2.** All gene sets.

**Supplemental Table 3.** Significant TcGSA gene sets.

**Supplemental Figure 1.** Apoptosis and cell-cycle analyses.

**Supplemental Figure 2.** Whole-transcriptome changes during the time-course experiments.

**Supplemental Figure 3.** L428 transfection experiments.

**Supplemental Figure 4.** GSEA analyses of L428 and L1236 cell lines treated with 5-Aza-dC/decitabine

**Supplemental Table 1. Clinical data.**

| cHL subtype  |        |            | CSF3R-positive | CSF3R-negative | p     |
|--------------|--------|------------|----------------|----------------|-------|
|              | NS     | 57         | 46             | 6              |       |
|              | MC     | 28         | 24             | 4              |       |
|              | LR     | 7          | 7              | 0              |       |
|              | NC     | 12         | 4              | 1              |       |
| Stage        |        |            |                |                | n.s.  |
|              | I-III  | 75         | 65             | 11             |       |
|              | IV     | 30         | 26             | 4              |       |
| Age          |        |            |                |                | 0.027 |
|              | 45     | 72         | 66             | 6              |       |
|              | >45    | 31         | 23             | 8              |       |
| Gender       |        |            |                |                | n.s.  |
|              | Male   | 45         | 35             | 8              |       |
|              | Female | 60         | 54             | 6              |       |
| IPS          |        |            |                |                | n.s.  |
|              | 3      | 32         |                |                |       |
|              | >3     | 71         |                |                |       |
| Relapse      |        |            |                |                |       |
|              | Yes    | 28         | 24             | 3              | n.s.  |
|              | No     | 75         | 64             | 11             |       |
| Outcome      |        |            |                |                | n.s.  |
|              | F      | 91         | 78             | 13             |       |
|              | U      | 27         | 24             | 3              |       |
| <b>Total</b> |        | <b>105</b> | <b>89</b>      | <b>16</b>      |       |

**Supplemental Table 2. All gene sets.**

| SOURCE                 | DATABASE                       | DESCRIPTION                                                       |
|------------------------|--------------------------------|-------------------------------------------------------------------|
| BioCarta               | BIOCARTA_BCELLSURVIVAL_PATHWAY | B-cell Survival Pathway                                           |
|                        | BIOCARTA_BCR_PATHWAY           | BCR Signaling Pathway                                             |
|                        | BIOCARTA_BLYMPHOCYTE_PATHWAY   | B Lymphocyte Cell Surface Molecules                               |
|                        | BIOCARTA_CACAM_PATHWAY         | Ca <sup>++</sup> / Calmodulin-dependent Protein Kinase Activation |
|                        | BIOCARTA_CASPASE_PATHWAY       | Caspase Cascade in Apoptosis                                      |
|                        | BIOCARTA_CD40_PATHWAY          | CD40L Signaling Pathway                                           |
|                        | BIOCARTA_CDC25_PATHWAY         | cdc25 and chk1 Regulatory Pathway in response to DNA damage       |
|                        | BIOCARTA_CELLCYCLE_PATHWAY     | Cyclins and Cell Cycle Regulation                                 |
|                        | BIOCARTA_CYTOKINE_PATHWAY      | Cytokine Network                                                  |
|                        | BIOCARTA_FCER1_PATHWAY         | Fc Epsilon Receptor I Signaling in Mast Cells                     |
|                        | BIOCARTA_G1_PATHWAY            | Cell Cycle: G1/S Checkpoint                                       |
|                        | BIOCARTA_G2_PATHWAY            | Cell Cycle: G2/M Checkpoint                                       |
|                        | BIOCARTA_GATA3_PATHWAY         | GATA3 participate in activating the Th2 cytokine genes expression |
|                        | BIOCARTA_GRANULOCYTES_PATHWAY  | Adhesion and Diapedesis of Granulocytes                           |
|                        | BIOCARTA_IFNA_PATHWAY          | IFN alpha signaling pathway                                       |
|                        | BIOCARTA_IFNG_PATHWAY          | IFN gamma signaling pathway                                       |
|                        | BIOCARTA_IL10_PATHWAY          | IL-10 Anti-inflammatory Signaling Pathway                         |
|                        | BIOCARTA_IL12_PATHWAY          | IL12 and Stat4-Dependent Signaling Pathway in Th1 Development     |
|                        | BIOCARTA_IL17_PATHWAY          | IL 17 Signaling Pathway                                           |
|                        | BIOCARTA_IL2_PATHWAY           | IL 2 signaling pathway                                            |
|                        | BIOCARTA_IL22BP_PATHWAY        | IL22 Soluble Receptor Signaling Pathway                           |
|                        | BIOCARTA_IL2RB_PATHWAY         | IL-2 Receptor Beta Chain in T-cell Activation                     |
|                        | BIOCARTA_IL3_PATHWAY           | IL 3 signaling pathway                                            |
|                        | BIOCARTA_IL4_PATHWAY           | IL 4 signaling pathway                                            |
|                        | BIOCARTA_IL5_PATHWAY           | IL 5 Signaling Pathway                                            |
|                        | BIOCARTA_IL6_PATHWAY           | IL 6 signaling pathway                                            |
|                        | BIOCARTA_IL7_PATHWAY           | IL-7 Signal Transduction                                          |
|                        | BIOCARTA_INFLAM_PATHWAY        | Cytokines and Inflammatory Response                               |
|                        | BIOCARTA_LYM_PATHWAY           | Adhesion and Diapedesis of Lymphocytes                            |
|                        | BIOCARTA_LYMPHOCYTE_PATHWAY    | Adhesion Molecules on Lymphocyte                                  |
|                        | BIOCARTA_MCM_PATHWAY           | CDK Regulation of DNA Replication                                 |
|                        | BIOCARTA_MHC_PATHWAY           | Antigen Processing and Presentation                               |
| BIOCARTA_NFKB_PATHWAY  | NF-kB Signaling Pathway        |                                                                   |
| BIOCARTA_STAT3_PATHWAY | Stat3 Signaling Pathway        |                                                                   |

|             |                                          |                                                                                                                                                                         |
|-------------|------------------------------------------|-------------------------------------------------------------------------------------------------------------------------------------------------------------------------|
|             | BIOCARTA_STRESS_PATHWAY                  | TNF/Stress-Related Signaling                                                                                                                                            |
|             | BIOCARTA_TCR_PATHWAY                     | T-cell Receptor Signaling Pathway                                                                                                                                       |
|             | BIOCARTA_TCYTOTOXIC_PATHWAY              | T Cytotoxic Cell Surface Molecules                                                                                                                                      |
|             | BIOCARTA_TGFB_PATHWAY                    | TGF beta signaling pathway                                                                                                                                              |
|             | BIOCARTA_TH1TH2_PATHWAY                  | Th1/Th2 Differentiation                                                                                                                                                 |
|             | BIOCARTA_THELPER_PATHWAY                 | T Helper Cell Surface Molecules                                                                                                                                         |
|             | BIOCARTA_TNFR1_PATHWAY                   | TNFR1 Signaling Pathway                                                                                                                                                 |
|             | BIOCARTA_TNFR2_PATHWAY                   | TNFR2 Signaling Pathway                                                                                                                                                 |
| MSigDB Team | DIRMEIER_LMP1_RESPONSE_EARLY             | Clusters 1 and 2: genes upregulated in B2264-19/3 cells (primary B lymphocytes) within 30-60 min of activation of LMP1 (oncogene encoded by Epstein-Barr virus, EBV)    |
|             | DIRMEIER_LMP1_RESPONSE_LATE_DN           | Cluster 4: genes downregulated in B2264-19/3 cells (primary B lymphocytes) within 60-180 min of activation of LMP1 (oncogene encoded by Epstein-Barr virus, EBV)        |
|             | DIRMEIER_LMP1_RESPONSE_LATE_UP           | Cluster 3: genes upregulated in B2264-19/3 cells (primary B lymphocytes) within 60-180 min after activation of LMP1 (oncogene encoded by Epstein-Barr virus, EBV)       |
|             | HADDAD_T_LYMPHOCYTE_AND_NK_PROGENITOR_DN | Genes downregulated in hematopoietic progenitor cells (HPC) of T lymphocyte and NK (natural killer) lineage                                                             |
|             | HADDAD_T_LYMPHOCYTE_AND_NK_PROGENITOR_UP | Genes upregulated in hematopoietic progenitor cells (HPC) of T lymphocyte and NK (natural killer) lineage                                                               |
|             | HALLMARK_INFLAMMATORY_RESPONSE           | Genes defining inflammatory response                                                                                                                                    |
|             | JAIN_NFKB_SIGNALING                      | Genes abnormally regulated in response to CD40L and IL4 [GeneID=959;3565] stimulation of B lymphocytes from patients with a hypomorphic mutation of IKBKG [GeneID=8517] |
|             | KLEIN_TARGETS_OF_BCR_ABL1_FUSION         | Genes changed in pre-B lymphoblastic leukemia cells with BCR-ABL1 fusion [GeneID=613, 25] vs. normal pre-B lymphocytes                                                  |
|             | WHITFIELD_CELL_CYCLE_LITERATURE          | A list of known cell-cycle-regulated genes that was compiled from the literature by the authors                                                                         |
|             | ZHAN_EARLY_DIFFERENTIATION_GENES_DN      | B lymphocyte early differentiation genes (EDG): top genes down-regulated in tonsil B lymphocytes (TBC) compared to the tonsil plasma cells (TPC)                        |
|             | ZHAN_EARLY_DIFFERENTIATION_GENES_UP      | B lymphocyte early differentiation genes (EDG): top genes up-regulated in tonsil B lymphocytes (TBC) compared to the tonsil plasma cells (TPC)                          |
|             | ZHAN_LATE_DIFFERENTIATION_GENES_DN       | B lymphocyte late differentiation genes (LDG): top genes down-regulated in plasma cells from tonsils (TPC) compared to those from bone marrow (BPC)                     |

|                                         |                                                                      |                                                                                                                                                  |
|-----------------------------------------|----------------------------------------------------------------------|--------------------------------------------------------------------------------------------------------------------------------------------------|
|                                         | ZHAN_LATE_DIFFERENTIATION_GENES_UP                                   | B lymphocyte late differentiation genes (LDG): top genes upregulated in plasma cells from tonsils (TPC) compared to those from bone marrow (BPC) |
| Kyoto Encyclopedia of Genes and Genomes | KEGG_APOPTOSIS                                                       | Apoptosis                                                                                                                                        |
|                                         | KEGG_B_CELL_RECEPTOR_SIGNALING_PATHWAY                               | B-cell receptor signaling pathway                                                                                                                |
|                                         | KEGG_CALCIIUM_SIGNALING_PATHWAY                                      | Calcium signaling pathway                                                                                                                        |
|                                         | KEGG_CELL_CYCLE                                                      | KEGG cell cycle                                                                                                                                  |
|                                         | KEGG_CHEMOKINE_SIGNALING_PATHWAY                                     | Chemokine signaling pathway                                                                                                                      |
|                                         | KEGG_CYTOKINE_CYTOKINE_RECEPTOR_INTERACTION                          | Cytokine–cytokine receptor interaction                                                                                                           |
|                                         | KEGG_FC_EPSILON_RI_SIGNALING_PATHWAY                                 | Fc epsilon RI signaling pathway                                                                                                                  |
|                                         | KEGG_FC_GAMMA_R_MEDIATED_PHAGOCYTOSIS                                | Fc gamma R-mediated phagocytosis                                                                                                                 |
|                                         | KEGG_JAK_STAT_SIGNALING_PATHWAY                                      | JAK/STAT signaling pathway                                                                                                                       |
|                                         | KEGG_NATURAL_KILLER_CELL_MEDIATED_CYTOTOXICITY                       | Natural killer cell mediated cytotoxicity                                                                                                        |
|                                         | KEGG_TGF_BETA_SIGNALING_PATHWAY                                      | TGF-beta signaling pathway                                                                                                                       |
| Broad Institute                         | MODULE_122> Adhesion molecules                                       | Adhesion molecules                                                                                                                               |
|                                         | MODULE_169                                                           | MODULE_169_Immune response                                                                                                                       |
|                                         | MODULE_170                                                           | MODULE_170_Immune response                                                                                                                       |
|                                         | MODULE_223                                                           | Immune (defense) response                                                                                                                        |
|                                         | MODULE_263                                                           | Chemotaxis (chemokines)                                                                                                                          |
|                                         | MODULE_291                                                           | B-cell malignancies expression clusters                                                                                                          |
|                                         | MODULE_33                                                            | Immune / stress response genes                                                                                                                   |
|                                         | MODULE_345                                                           | Immune response and Ag processing and presentation                                                                                               |
|                                         | MODULE_358                                                           | MODULE_358_B lymphoma expression clusters                                                                                                        |
|                                         | MODULE_361                                                           | MODULE_361_B lymphoma expression clusters                                                                                                        |
|                                         | MODULE_362                                                           | Angiogenesis                                                                                                                                     |
|                                         | MODULE_456                                                           | MODULE_456_B lymphoma expression clusters                                                                                                        |
|                                         | MODULE_521                                                           | T-cell proliferation genes                                                                                                                       |
|                                         | MODULE_522                                                           | Immune response genes                                                                                                                            |
|                                         | MODULE_54                                                            | Cell cycle (expression cluster)                                                                                                                  |
|                                         | MODULE_545                                                           | IL-1 signaling                                                                                                                                   |
|                                         | MODULE_56                                                            | Cell cycle (KEGG, GenMapp)                                                                                                                       |
|                                         | MODULE_75                                                            | Immune response                                                                                                                                  |
|                                         | MODULE_76                                                            | Inflammatory response                                                                                                                            |
| MODULE_84                               | Immune (humoral) and inflammatory response                           |                                                                                                                                                  |
| Reactome                                | REACTOME_ACTIVATION_OF_CASPASES_THROUGH_APOPTOSOME_MEDIATED_CLEAVAGE | Activation of caspases through apoptosome-mediated cleavage                                                                                      |

|                                                                                           |                                                                                    |
|-------------------------------------------------------------------------------------------|------------------------------------------------------------------------------------|
| REACTOME_ACTIVATION_OF_NF_KAPPA_B_IN_B_CELLS                                              | Activation of NF-kappaB in B-cells                                                 |
| REACTOME_ACTIVATION_OF_RAS_IN_B_CELLS                                                     | Activation of RAS in B-cells                                                       |
| REACTOME_ADAPTIVE_IMMUNE_SYSTEM                                                           | Adaptive Immune System                                                             |
| REACTOME_ANTIGEN_ACTIVATES_B_CELL_RECEPTOR_BCR_LEADING_TO_GENERATION_OF_SECOND_MESSENGERS | Antigen activates B-cell Receptor (BCR) leading to generation of second messengers |
| REACTOME_ANTIGEN_PRESENTATION_FOLDING_ASSEMBLY_AND_PEPTIDE_LOADING_OF_CLASS_I_MHC         | Antigen Presentation: Folding, assembly and peptide loading of class I MHC         |
| REACTOME_CA_DEPENDENT_EVENTS                                                              | Ca-dependent events                                                                |
| REACTOME_CA2_ACTIVATED_K_CHANNELS                                                         | Ca <sup>2+</sup> activated K <sup>+</sup> channels                                 |
| REACTOME_CA2_PATHWAY                                                                      | Ca <sup>2+</sup> pathway                                                           |
| REACTOME_CALCINEURIN_ACTIVATES_NFAT                                                       | Calcineurin activates NFAT                                                         |
| REACTOME_CD22_MEDIATED_BCR_REGULATION                                                     | CD22 mediated BCR regulation                                                       |
| REACTOME_CD28_CO_STIMULATION                                                              | CD28 co-stimulation                                                                |
| REACTOME_CD28_DEPENDENT_PI3K_AKT_SIGNALING                                                | CD28 dependent PI3K/Akt signaling                                                  |
| REACTOME_CD28_DEPENDENT_VAV1_PATHWAY                                                      | CD28 dependent Vav1 pathway                                                        |
| REACTOME_CELL_CYCLE                                                                       | Reactome Cell Cycle                                                                |
| REACTOME_CELL_CYCLE_CHECKPOINTS                                                           | Cell Cycle Checkpoints                                                             |
| REACTOME_CELL_CYCLE_MITOTIC                                                               | Cell Cycle, Mitotic                                                                |
| REACTOME_CHEMOKINE_RECEPTORS_BIND_CHEMOKINES                                              | Chemokine receptors bind chemokines                                                |
| REACTOME_CLASS_I_MHC_MEDIATED_ANTIGEN_PROCESSING_PRESENTATION                             | Class I MHC mediated antigen processing & presentation                             |
| REACTOME_CYTOKINE_SIGNALING_IN_IMMUNE_SYSTEM                                              | Cytokine Signaling in Immune system                                                |
| REACTOME_DOWNREGULATION_OF_TGF_BETA_RECEPTOR_SIGNALING                                    | Downregulation of TGF-beta receptor signaling                                      |
| REACTOME_DOWNSTREAM_SIGNALING_EVENTS_OF_B_CELL_RECEPTOR_BCR                               | Downstream signaling events of B-cell Receptor (BCR)                               |
| REACTOME_DOWNSTREAM_TCR_SIGNALING                                                         | Downstream TCR signaling                                                           |
| REACTOME_FC_EPSILON_RECEPTOR_FCERI_SIGNALING                                              | Fc epsilon receptor (FCERI) signaling                                              |
| REACTOME_G1_S_DNA_DAMAGE_CHECKPOINTS                                                      | G1/S DNA Damage Checkpoints                                                        |
| REACTOME_G1_S_SPECIFIC_TRANSCRIPTION                                                      | G1/S-Specific Transcription                                                        |

|                                                                                       |                                                                                |
|---------------------------------------------------------------------------------------|--------------------------------------------------------------------------------|
| REACTOME_G2_M_CHECKPOINTS                                                             | G2/M Checkpoints                                                               |
| REACTOME_G2_M_DNA_DAMAGE_CHECKPOINT                                                   | G2/M DNA damage checkpoint                                                     |
| REACTOME_G2_M_DNA_REPLICATION_CHECKPOINT                                              | G2/M DNA replication checkpoint                                                |
| REACTOME_G2_PHASE                                                                     | G2 Phase                                                                       |
| REACTOME_IL_6_TYPE_CYTOKINE_RECEPTOR_LIGAND_INTERACTIONS                              | IL-6-type cytokine receptor ligand interactions                                |
| REACTOME_IMMUNE_SYSTEM                                                                | Genes involved in Immune System                                                |
| REACTOME_IMMUNOREGULATORY_INTERACTIONS_BETWEEN_A_LYMPHOID_AND_A_NON_LYMPHOID_CELL     | Immunoregulatory interactions between a Lymphoid and a non-Lymphoid cell       |
| REACTOME_INNATE_IMMUNE_SYSTEM                                                         | Innate Immune System                                                           |
| REACTOME_INTERFERON_GAMMA_SIGNALING                                                   | Interferon gamma signaling                                                     |
| REACTOME_INTERFERON_SIGNALING                                                         | Interferon Signaling                                                           |
| REACTOME_INTERLEUKIN_10_SIGNALING                                                     | Interleukin-10 signaling                                                       |
| REACTOME_INTERLEUKIN_4_AND_INTERLEUKIN_13_SIGNALING                                   | Interleukin-4 and Interleukin-13 signaling                                     |
| REACTOME_INTERLEUKIN_6_FAMILY_SIGNALING                                               | Interleukin-6 family signaling                                                 |
| REACTOME_MHC_CLASS_II_ANTIGEN_PRESENTATION                                            | MHC class II antigen presentation                                              |
| REACTOME_RUNX1_REGULATES_TRANSCRIPTION_OF_GENES_INVOLVED_IN_BCR_SIGNALING             | RUNX1 regulates transcription of genes involved in BCR signaling               |
| REACTOME_SIGNALING_BY_RECEPTOR_TYROSINE_KINASES                                       | Signaling by Receptor Tyrosine Kinases                                         |
| REACTOME_SIGNALING_BY_THE_B_CELL_RECEPTOR_BCR                                         | Signaling by the B-cell Receptor (BCR)                                         |
| REACTOME_STAT5_ACTIVATION                                                             | STAT5 Activation                                                               |
| REACTOME_TCR_SIGNALING                                                                | TCR signaling                                                                  |
| REACTOME_TNF_RECEPTOR_SUPERFAMILY_TNFSF_MEMBERS_MEDIATING_NON_CANONICAL_NF_KB_PATHWAY | TNF receptor superfamily (TNFSF) members mediating non-canonical NF-kB pathway |
| REACTOME_TNF_SIGNALING                                                                | TNF signaling                                                                  |
| REACTOME_TNFR1_INDUCED_NFKAPPAB_SIGNALING_PATHWAY                                     | TNFR1-induced NFkappaB signaling pathway                                       |
| REACTOME_TNFR1_INDUCED_PROAPOPTOTIC_SIGNALING                                         | TNFR1-induced proapoptotic signaling                                           |

Supplemental Table 3. Significant TcGSA gene sets

| Description                                                              | p         | Public database gene set name                                                     | Contributor                             |
|--------------------------------------------------------------------------|-----------|-----------------------------------------------------------------------------------|-----------------------------------------|
| Immune response                                                          | 3.218E-34 | MODULE_75                                                                         | Broad Institute                         |
| Cytokine-cytokine receptor interaction                                   | 3.364E-30 | KEGG_CYTOKINE_CYTOKINE_RECEPTOR_INTERACTION                                       | Kyoto Encyclopedia of Genes and Genomes |
| Immunoregulatory interactions between a lymphoid and a non-lymphoid cell | 5.837E-18 | REACTOME_IMMUNOREGULATORY_INTERACTIONS_BETWEEN_A_LYMPHOID_AND_A_NON_LYMPHOID_CELL | Reactome                                |
| Calcium signaling pathway                                                | 9.750E-16 | KEGG_CALCIUM_SIGNALING_PATHWAY                                                    | Kyoto Encyclopedia of Genes and Genomes |
| JAK/STAT signaling pathway                                               | 2.653E-12 | KEGG_JAK_STAT_SIGNALING_PATHWAY                                                   | Kyoto Encyclopedia of Genes and Genomes |
| Adhesion molecules                                                       | 2.653E-12 | MODULE_122                                                                        | Broad Institute                         |
| Chemotaxis (chemokines)                                                  | 5.797E-12 | MODULE_263                                                                        | Broad Institute                         |
| Immune / stress response genes                                           | 1.355E-11 | MODULE_33                                                                         | Broad Institute                         |
| IL 17 signaling pathway                                                  | 5.111E-10 | BIOCARTA_IL17_PATHWAY                                                             | BioCarta                                |
| Inflammatory response                                                    | 1.561E-08 | MODULE_76                                                                         | Broad Institute                         |
| Cell cycle, mitotic                                                      | 1.646E-08 | REACTOME_CELL_CYCLE_MITOTIC                                                       | Reactome                                |
| Immune (defense) response                                                | 4.210E-08 | MODULE_223                                                                        | Broad Institute                         |
| Chemokine receptors bind chemokines                                      | 2.031E-06 | REACTOME_CHEMOKINE_RECEPTORS_BIND_CHEMOKINES                                      | Reactome                                |
| Immune response                                                          | 3.929E-06 | MODULE_170                                                                        | Broad Institute                         |
| Genes defining inflammatory response                                     | 7.035E-06 | HALLMARK_INFLAMMATORY_RESPONSE                                                    | MSigDB Team                             |
| Signaling by receptor tyrosine kinases                                   | 2.356E-05 | REACTOME_SIGNALING_BY_RECEPTOR_TYROSINE_KINASES                                   | Reactome                                |
| Cell cycle: G2/M checkpoint                                              | 7.081E-05 | BIOCARTA_G2_PATHWAY                                                               | BioCarta                                |
| Cytokine network                                                         | 1.708E-04 | BIOCARTA_CYTOKINE_PATHWAY                                                         | BioCarta                                |
| T-cell proliferation genes                                               | 2.637E-04 | MODULE_521                                                                        | Broad Institute                         |
| Chemokine signaling pathway                                              | 3.707E-04 | KEGG_CHEMOKINE_SIGNALING_PATHWAY                                                  | Kyoto Encyclopedia of Genes and Genomes |
| TNF signaling                                                            | 8.846E-04 | REACTOME_TNF_SIGNALING                                                            | Reactome                                |
| Natural killer cell mediated cytotoxicity                                | 1.295E-03 | KEGG_NATURAL_KILLER_CELL_MEDIATED_CYTOTOXICITY                                    | Kyoto Encyclopedia of Genes and Genomes |
| Cell cycle checkpoints                                                   | 2.703E-03 | REACTOME_CELL_CYCLE_CHECKPOINTS                                                   | Reactome                                |
| Class I MHC-mediated antigen processing and presentation                 | 5.412E-03 | REACTOME_CLASS_I_MHC_MEDIATED_ANTIGEN_PROCESSING_PRESENTATION                     | Reactome                                |
| B-cell malignancies expression clusters                                  | 8.306E-03 | MODULE_291                                                                        | Broad Institute                         |
| Signaling by the B-cell receptor (BCR)                                   | 9.270E-03 | REACTOME_SIGNALING_BY_THE_B_CELL_RECEPTOR_BCR                                     | Reactome                                |
| IL-6-type cytokine receptor ligand interactions                          | 1.220E-02 | REACTOME_IL_6_TYPE_CYTOKINE_RECEPTOR_LIGAND_INTERACTIONS                          | Reactome                                |
| Downstream signaling events of B-cell receptor (BCR)                     | 1.327E-02 | REACTOME_DOWNSTREAM_SIGNALING_EVENTS_OF_B_CELL_RECEPTOR_BCR                       | Reactome                                |
| IL-1 signaling.                                                          | 1.715E-02 | MODULE_545                                                                        | Broad Institute                         |
| Interleukin-10 signaling                                                 | 2.798E-02 | REACTOME_INTERLEUKIN_10_SIGNALING                                                 | Reactome                                |



|                                                                                                                     |           |                                                        |             |
|---------------------------------------------------------------------------------------------------------------------|-----------|--------------------------------------------------------|-------------|
| <b>Interleukin-4 and Interleukin-13 signaling</b>                                                                   | 3.227E-02 | REACTOME_INTERLEUKIN_4_AND_INTERLEUKIN_13_SIGNALING    | Reactome    |
| <b>MHC pathway. Antigen processing and presentation</b>                                                             | 3.230E-02 | BIOCARTA_MHC_PATHWAY                                   | BioCarta    |
| <b>Fc epsilon receptor (FCERI) signaling</b>                                                                        | 3.322E-02 | REACTOME_FC_EPSILON_RECEPTOR_FCERI_SIGNALING           | Reactome    |
| <b>Genes downregulated in primary B lymphocytes after activation of LMP1</b>                                        | 3.590E-02 | DIRMEIER_LMP1_RESPONSE_LATE_DN                         | MSigDB Team |
| <b>Downregulation of TGF-beta receptor signaling</b>                                                                | 3.590E-02 | REACTOME_DOWNREGULATION_OF_TGF_BETA_RECEPTOR_SIGNALING | Reactome    |
| <b>Interleukin-6 family signaling</b>                                                                               | 3.590E-02 | REACTOME_INTERLEUKIN_6_FAMILY_SIGNALING                | Reactome    |
| <b>Genes downregulated in hematopoietic progenitor cells (HPCs) of T lymphocyte and NK (natural killer) lineage</b> | 4.015E-02 | HADDAD_T_LYMPHOCYTE_AND_NK_PROGENITOR_DN               | MSigDB Team |

**Supplemental Figure 1.** Apoptosis (A) and cell-cycle analyses (B) Percentage of apoptotic cells (% annexin V+) and G2/M fraction before (top panels) and after ruxolitinib treatment (bottom panels) (two-way ANOVA: \*\*\* p <0.001).

A)

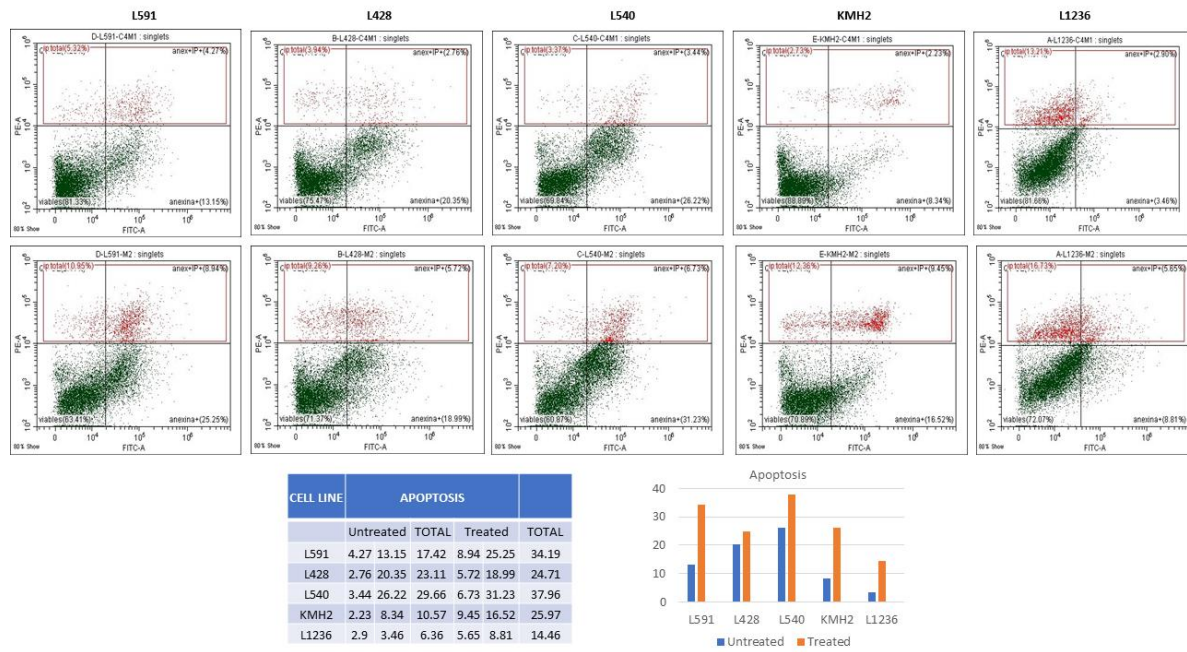

B)

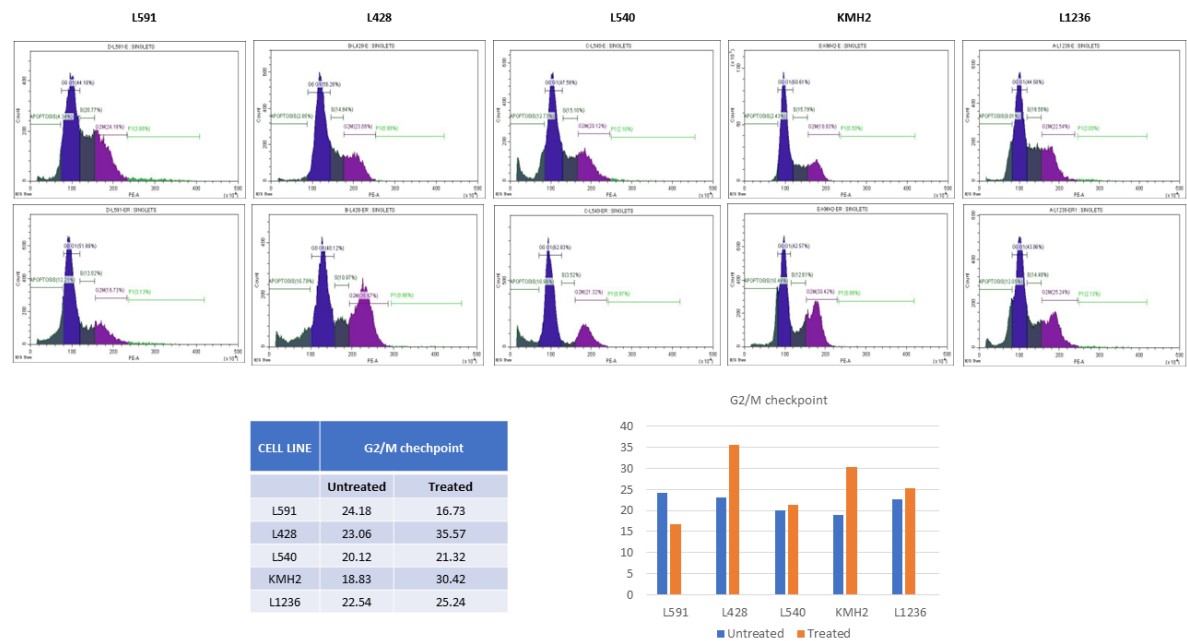

**Supplemental Figure 2.** A) Unsupervised analyses of whole transcriptome changes during the time-course experiments reveal massive transcriptional changes, affecting more than 18% of the transcriptome (average 5360 genes more than three-fold upregulated or downregulated, range 2460-7198 genes). B) GSEA, global enrichment score (ES) histogram confirms that most of the changes involved gene downregulation.

A)

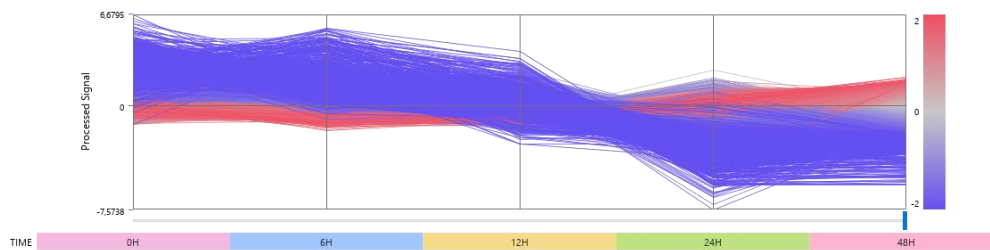

B)

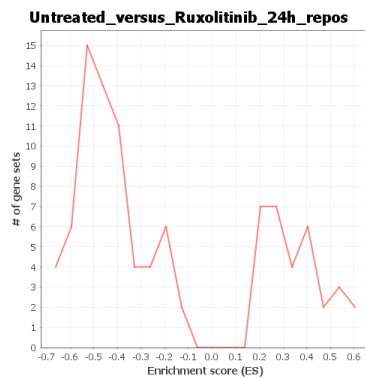

**Supplemental Figure 3.** L-428 transfection experiments using PCMV6-hCSF3R-Myc-DDK-tagged vector. Left: transfection efficiency is evaluated using IHC with anti-Myc mAb (CNIO). Right: viability assays confirming lower ruxolitinib-induced toxicity in L-428-transfected cells.

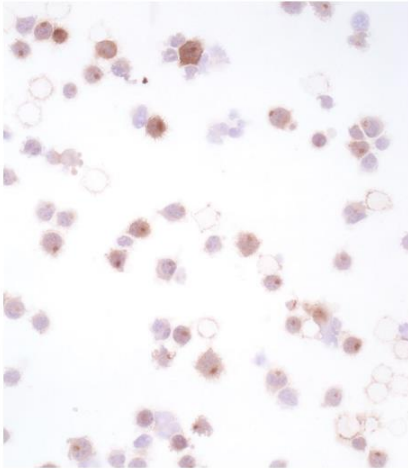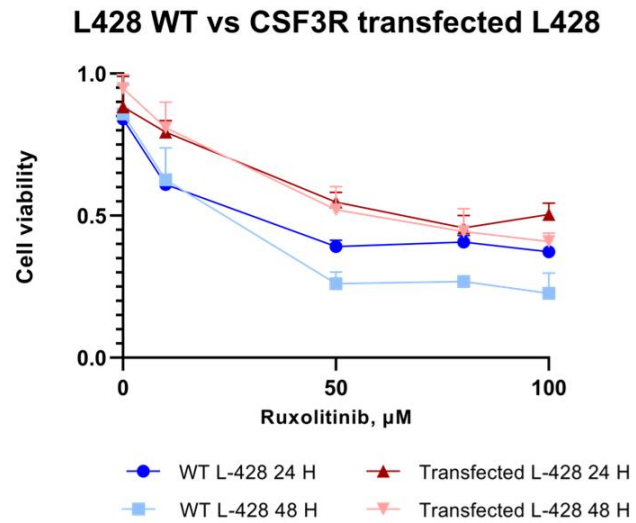

**Supplemental Figure 4.** GSEA analyses of L-428 and L-1236 cell lines treated with 5-Aza-dC/decitabine (<https://www.ncbi.nlm.nih.gov/geo/query/acc.cgi?acc=GSE86068>)<sup>38</sup> (top panel), compared with ruxolitinib (bottom panel), showing completely different modulation of pathways. The y-axis represents the enrichment score (ES), comparing phenotypes untreated and after 24 h of treatment. The bars correspond to gene sets upregulated in untreated cells (gene sets with a nominal value of  $p < 0.05$  are marked with an asterisk).

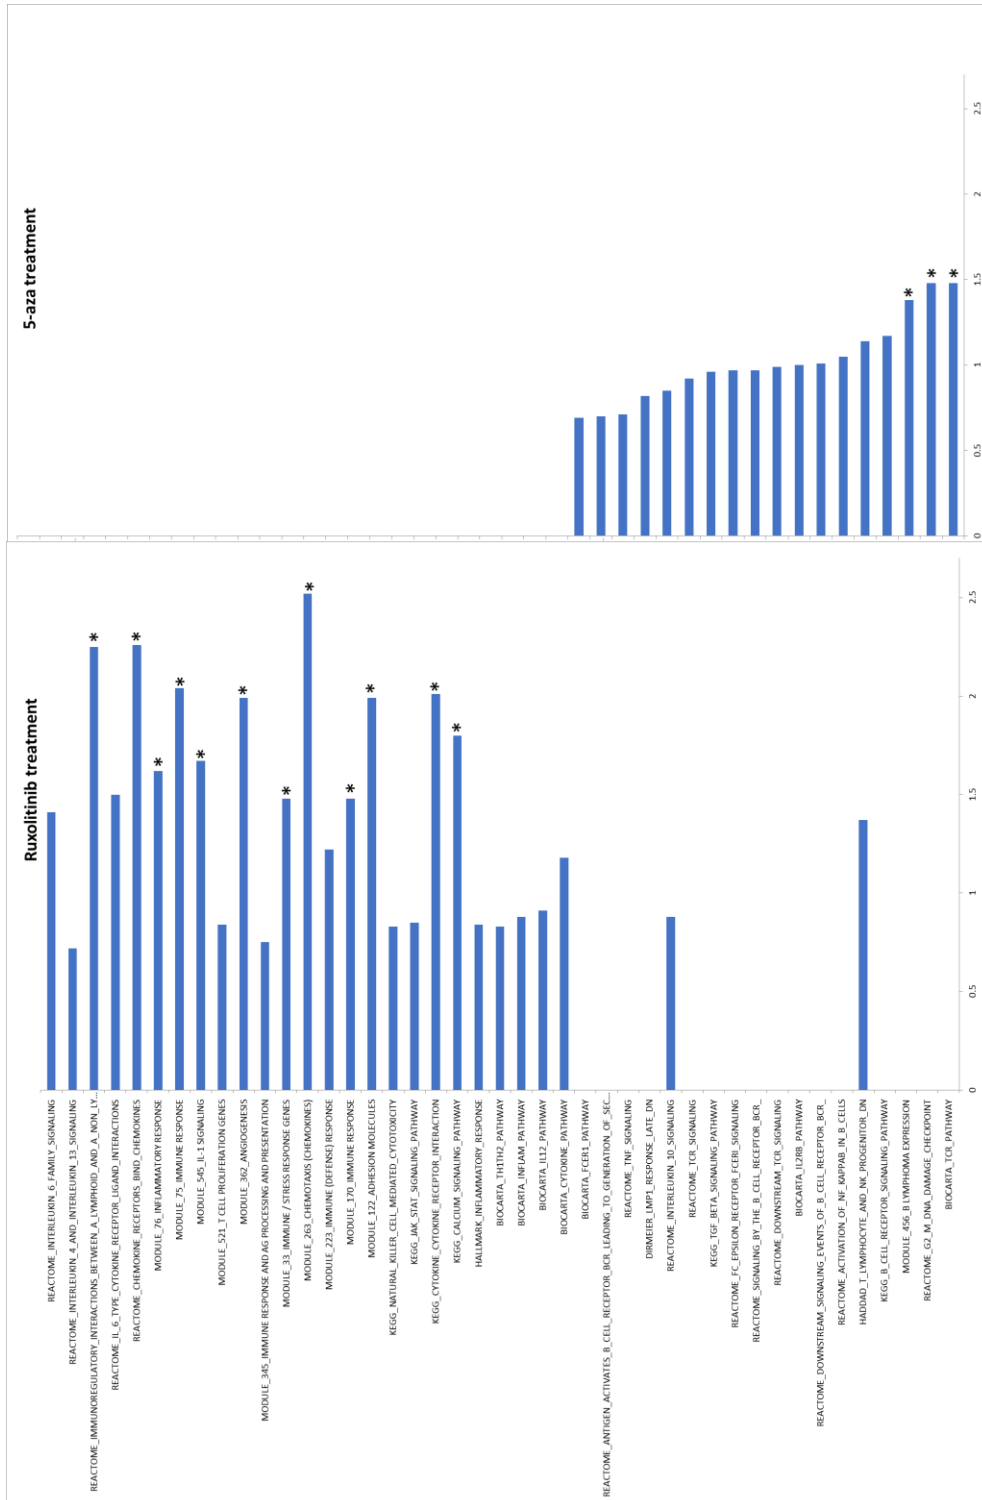

Supplement: BLOODA_ADV-2021-006336R3-mmc1.pdf [file BLOODA_ADV-2021-006336R3-mmc1.pdf]
